# Supplementary material
Source: HighWire-hosted journal article supplement (https://cmaj.ca/highwire/filestream/58487/field_highwire_adjunct_files/1/why-missiuna-online_appendix_2.pdf)
Supplement: why-missiuna-online_appendix_2.pdf [file why-missiuna-online_appendix_2.pdf]

## Appendix 2: Screening activities to assist in the diagnosis of developmental coordination disorder, by age

| Age of child, yr | Paper and pencil                                                                                                                                                                                                                  | Standing                                                        | Throwing and catching a tennis ball                                                         |
|------------------|-----------------------------------------------------------------------------------------------------------------------------------------------------------------------------------------------------------------------------------|-----------------------------------------------------------------|---------------------------------------------------------------------------------------------|
| 4                | <ul style="list-style-type: none"> <li>Draw: </li> <li>Draw a person with at least 3 body parts</li> </ul>                                       | Stand on one foot for 3 seconds                                 | Throw with direction to a person 5 feet (1.5 m) away                                        |
| 5                | <ul style="list-style-type: none"> <li>Draw: </li> <li>Print first name (letter reversals may be present)</li> </ul>                             | Hop 5 times                                                     | Catch tennis ball with 2 hands from 5 feet (1.5 m) away (can use body to trap the ball)     |
| 6                | <ul style="list-style-type: none"> <li>Draw: </li> <li>Print first and last names correctly</li> </ul>                                           | Stand on one foot for 10 seconds                                | Catch tennis ball with 2 hands from 5 feet (1.5 m) away (hands only, not body)              |
| 7                | <ul style="list-style-type: none"> <li>Draw: </li> <li>Draw a person with at least 8 body parts</li> </ul>                                       | Skip forward for 20 feet (6 m)                                  | Bounce and catch tennis ball – 2-handed catch                                               |
| 8                | <ul style="list-style-type: none"> <li>Draw: </li> <li>Copy the sentence “The quick brown fox jumps over the lazy dog” in 1 minute</li> </ul>    | Stand on one foot for 20 seconds                                | Bounce and catch tennis ball – 1-handed catch                                               |
| 9                | <ul style="list-style-type: none"> <li>Draw: </li> <li>Copy the sentence “The quick brown fox jumps over the lazy dog” in 30 seconds</li> </ul> | Hop forward 5 times, stop and balance on one foot for 5 seconds | Throw tennis ball at wall from 5 feet (1.5 m) away and catch with 2 hands before it bounces |

### Diagnostic cues

#### Drawing and printing

##### Watch for

- Head too close to paper
- Awkward or tense pencil grasp
- Failure to use nondominant hand to stabilize the paper
- Uses excessive force
- Rotates paper or body

#### Hopping/standing on one foot

##### Watch for

- Looks at feet
- Exaggerated arm movements
- Lack of rhythm in hops
- Heavy, flat-footed or stiff-legged landings
- Holds body rigidly

#### Throwing/bouncing tennis ball

##### Watch for

- Lack of adjustment of body position
- Inaccurate aim
- Poor judgment of force needed
- Changes hands between trials
- Does not look at target

#### Catching tennis ball

##### Watch for

- Turns away/closes eyes/flinches
- Arms and hands do not “give” with contact from ball
- Does not adjust/correct if unsuccessful
- Positions self incorrectly (e.g., arms too far apart)
